# Supplementary material for: Evidence for SARS-CoV-2 related coronaviruses circulating in bats and pangolins in Southeast Asia
Source: PubMed Central journal article supplement (PMC7873279; doi:10.1038/s41467-021-21240-1), 2021-02-09
Supplement: 41467_2021_21240_MOESM1_ESM.pdf [file 41467_2021_21240_MOESM1_ESM.pdf]

**Supplementary figures and tables**  
**for**  
**Evidence for SARS-CoV-2 related coronaviruses circulating in bats and pangolins in Southeast Asia**

Supaporn Wacharapluesadee<sup>1</sup>†, Chee Wah Tan<sup>2</sup>†, Patarapol Maneeorn<sup>3</sup>†, Prateep Duengkae<sup>4</sup>, Feng Zhu<sup>2</sup>, Yutthana Joyjinda<sup>1</sup>, Thongchai Kaewpom<sup>1</sup>, Wan Ni Chia<sup>2</sup>, Weenassarin Ampoot<sup>1</sup>, Beng Lee Lim<sup>2</sup>, Kanthita Worachotsueptrakun<sup>1</sup>, Vivian Chih-Wei Chen<sup>2</sup>, Nutthinee Sirichan<sup>4</sup>, Chanida Ruchisrisarod<sup>1</sup>, Apaporn Rodpan<sup>1</sup>, Kirana Noradechanon<sup>3</sup>, Thanawadee Phaichana<sup>3</sup>, Niran Jantarat<sup>3</sup>, Boonchu Thongnumchaima<sup>3</sup>, Changchun Tu<sup>5,6</sup>, Gary Cramer<sup>7</sup>, Martha M. Stokes<sup>8</sup>, Thiravat Hemachudha<sup>1\*</sup>, Lin-Fa Wang<sup>1,9\*</sup>

<sup>1</sup>Thai Red Cross Emerging Infectious Diseases Health Science Centre, WHO Collaborating Centre for Research and Training on Viral Zoonoses, King Chulalongkorn Memorial Hospital

Faculty of Medicine, Chulalongkorn University, Thailand

<sup>2</sup>Programme in Emerging Infectious Diseases, Duke-NUS Medical School, Singapore

<sup>3</sup>Department of National Parks, Wildlife and Plant Conservation, Ministry of Natural Resources and Environment, Thailand

<sup>4</sup>Forest Biology Department, Faculty of Forestry, Kasetsart University, Thailand

<sup>5</sup>Changchun Veterinary Research Institute, Chinese Academy of Agricultural Sciences, Changchun, China

<sup>6</sup>Jiangsu Co-innovation Center for Prevention and Control of Important Animal Infectious Diseases and Zoonosis, Yangzhou University, Yangzhou, China

<sup>7</sup>CSIRO Australian Animal Health Laboratory, Geelong, Australia

<sup>8</sup>Biological Threat Reduction Program, Defense Threat Reduction Agency, USA

<sup>9</sup>SingHealth Duke-NUS Global Health Institute, Singapore

†These authors contributed equally

\* These authors jointly supervised this work. Correspondence may be addressed to L-FW

[linfa.wang@duke-nus.edu.sg](mailto:linfa.wang@duke-nus.edu.sg) and TH [fmedthm@gmail.com](mailto:fmedthm@gmail.com)

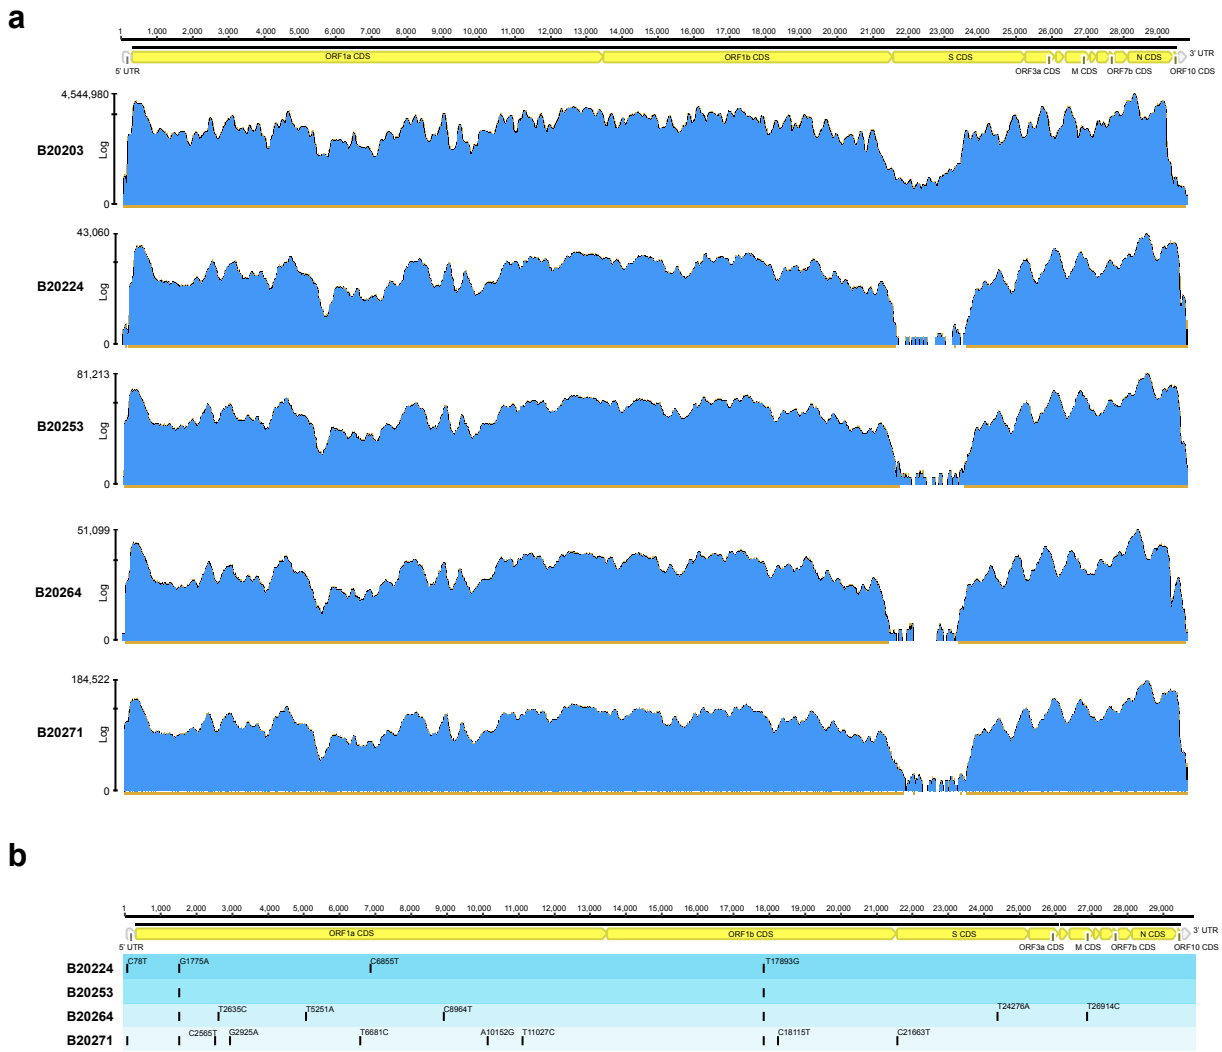

**Supplementary Fig. 11 Genome characterization.** (a) Quality of the five individual genome assembly, reads coverage are shown on a log scale. Region of coverage lower than 5 reads was marked in orange; (b) SNIP analysis of four genomes mapping onto the reference genome RacCS203. Maximum p-value is  $1 \times 10^{-6}$  and minimum variant frequency is 0.25. Low coverage region was marked in rectangle for reference.

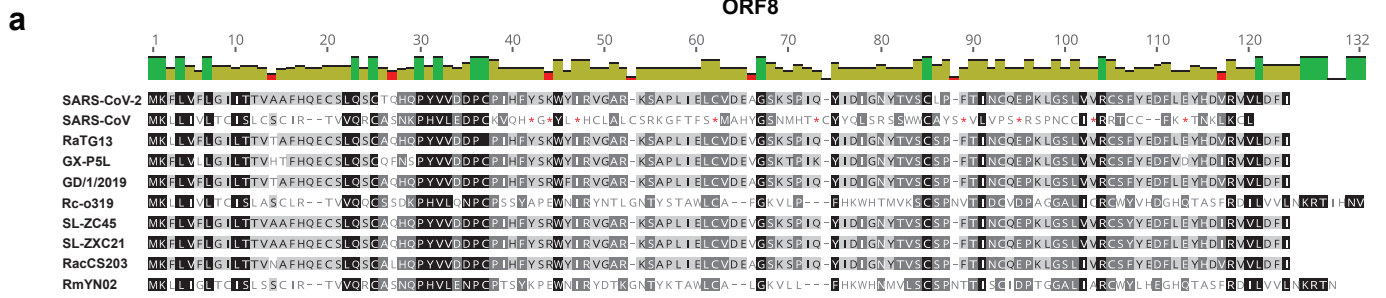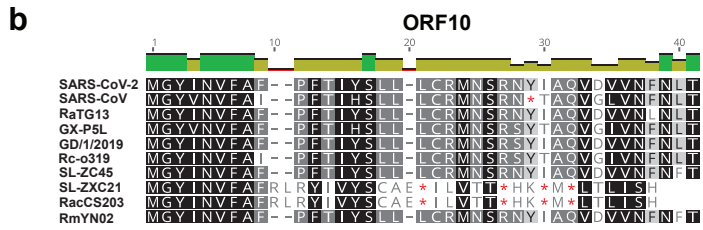

**Supplementary Fig. 2| Amino acid sequence comparison.** Molecular characterization of (a) ORF8 and (b) ORF10 of RacCS203 and representative SC2r-CoV and SC1r-CoVs. Identity plot was presented above the amino acid alignment. Green indicates high identity and red indicates low identity.

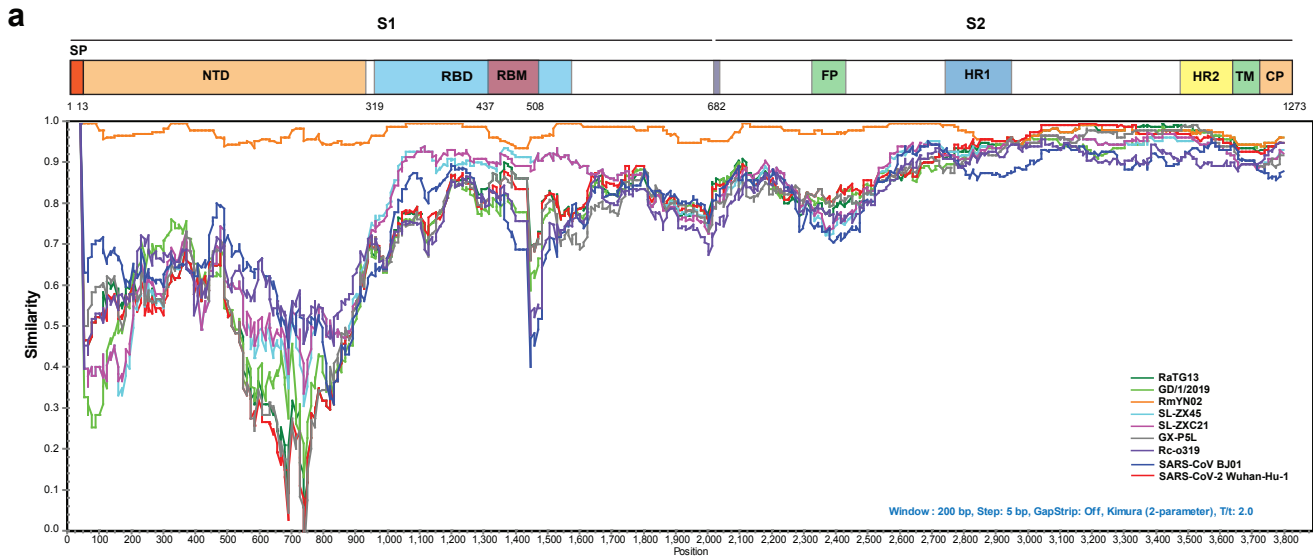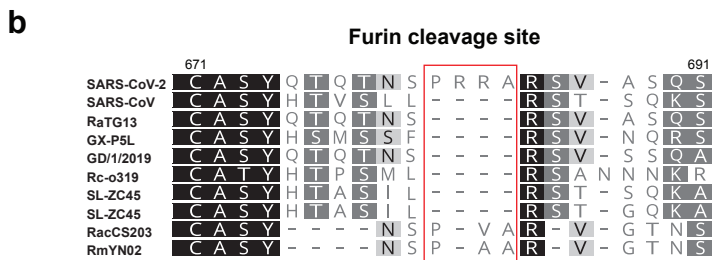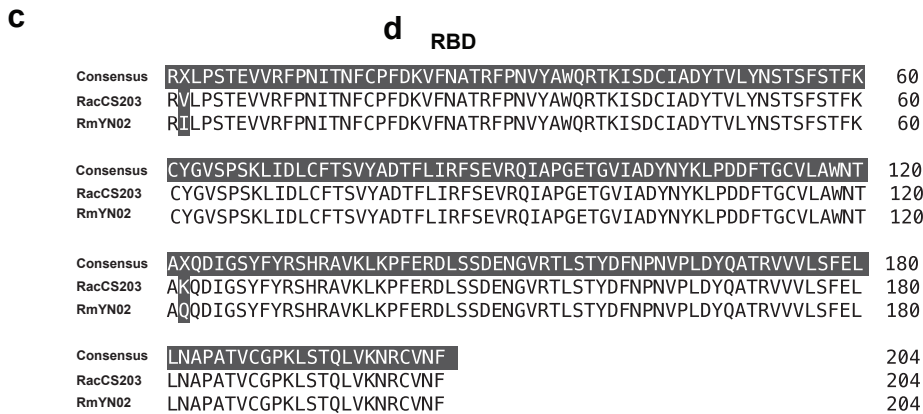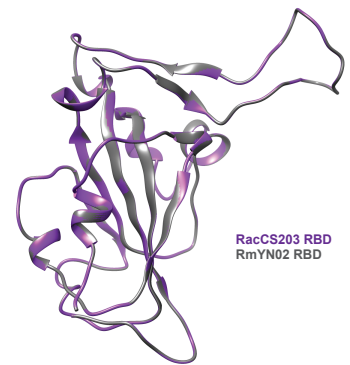

**Supplementary Fig. 3 | Detailed sequence comparison for S protein.** (a) Similarity plot of SC2r-CoV; (b) Multiple alignment of SARSr-CoV at the furin cleavage site; (c) RBD alignment of RacCS203 and RmYN02; (d) RBD modeling to illustrate the key difference between RacCS203 and SARS-CoV-2 using SARS-CoV-2 RBD (PDB: 6VW1) as a template.

**a** World distribution of *Rhinolophus* species

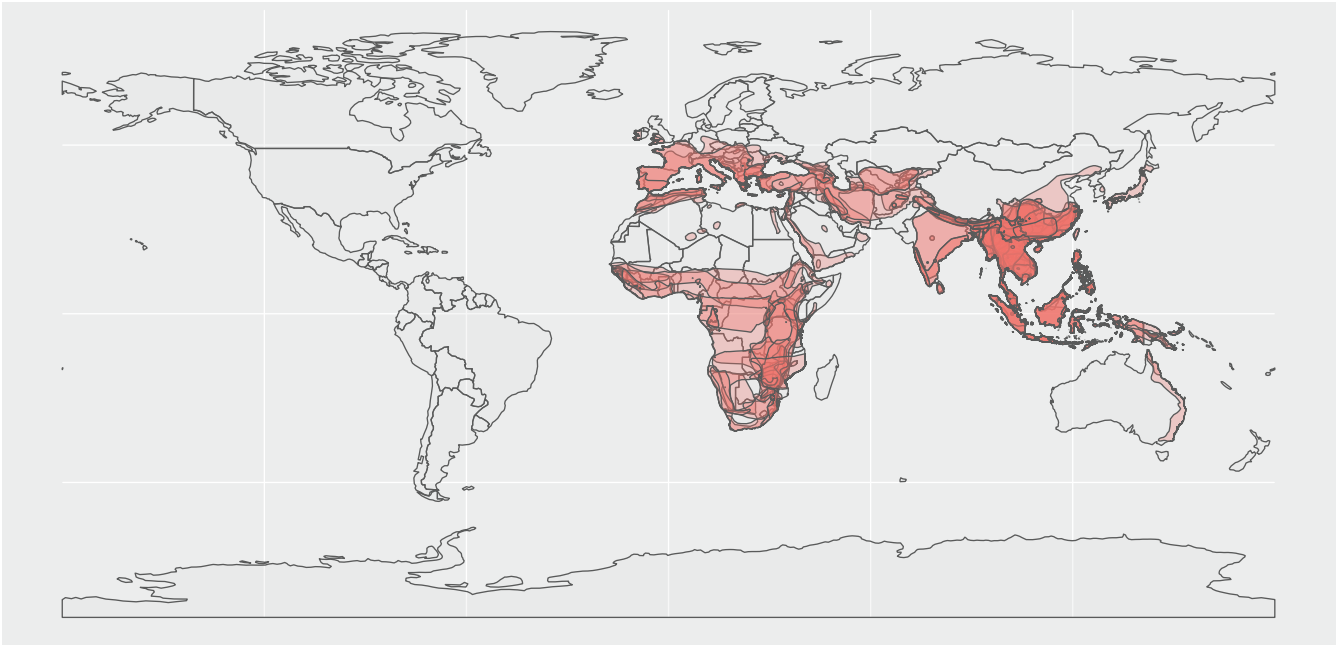

**b** 5 *Rhinolophus* species Distribution in East and South East Asia

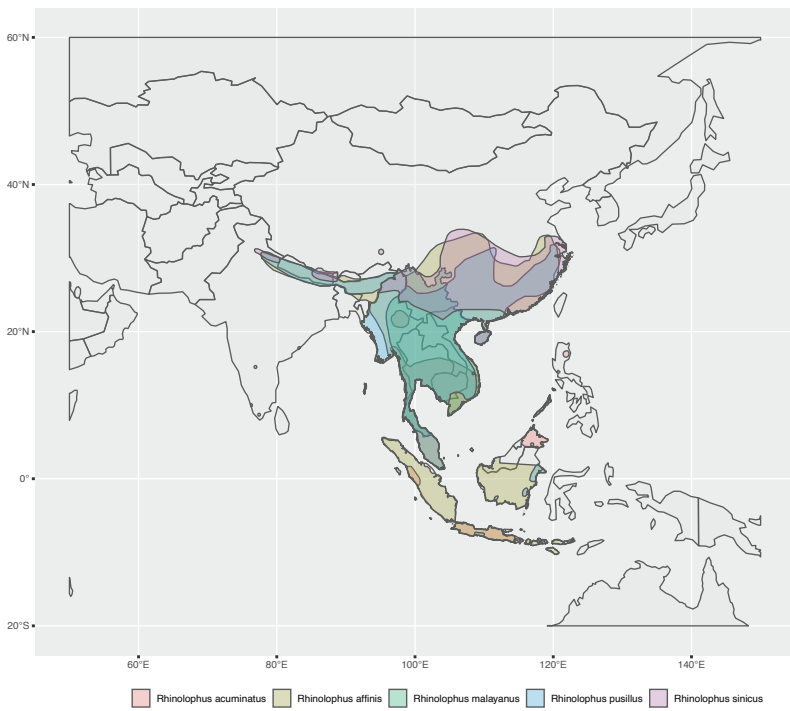

**Supplementary Fig. 4| Distribution of *Rhinolophus* bats.** (a) World-wide distribution for all 92 *Rhinolophus* species; (b) East and South East Asia distribution of 5 species that are found to contain SC2r-CoVs. Data retrieved from IUCN Red List of Threatened Species version 1.18 <https://www.iucnredlist.org>. Downloaded on 25<sup>th</sup> Oct 2020.

**Supplementary Table 1. Summary of bat surveillance data**

| Sample ID # | Collection Date | sVNT  | PCR* | Date of Analysis | NGS Analysis |
|-------------|-----------------|-------|------|------------------|--------------|
| B20201      | 19/06/2020      | <20%  | -ve  | 27/06/2020       |              |
| B20202      | 19/06/2020      | <20%  | -ve  | 27/06/2020       |              |
| B20203      | 19/06/2020      | <20%  | +ve  | 27/06/2020       | Yes          |
| B20204      | 19/06/2020      | <20%  | -ve  | 27/06/2020       |              |
| B20205      | 19/06/2020      | <20%  | -ve  | 27/06/2020       |              |
| B20206      | 19/06/2020      | <20%  | -ve  | 27/06/2020       |              |
| B20207      | 19/06/2020      | <20%  | -ve  | 27/06/2020       |              |
| B20208      | 19/06/2020      | <20%  | -ve  | 27/06/2020       |              |
| B20209      | 19/06/2020      | <20%  | +ve  | 27/06/2020       |              |
| B20210      | 19/06/2020      | <20%  | -ve  | 27/06/2020       |              |
| B20211      | 19/06/2020      | <20%  | -ve  | 27/06/2020       |              |
| B20212      | 19/06/2020      | <20%  | -ve  | 27/06/2020       |              |
| B20213      | 19/06/2020      | 34.6% | +ve  | 27/06/2020       |              |
| B20214      | 19/06/2020      | <20%  | -ve  | 27/06/2020       |              |
| B20215      | 19/06/2020      | <20%  | -ve  | 27/06/2020       |              |
| B20216      | 19/06/2020      | <20%  | -ve  | 27/06/2020       |              |
| B20217      | 19/06/2020      | <20%  | -ve  | 27/06/2020       |              |
| B20218      | 19/06/2020      | NA†   | -ve  | 27/06/2020       |              |
| B20219      | 19/06/2020      | <20%  | -ve  | 27/06/2020       |              |
| B20220      | 19/06/2020      | NA    | -ve  | 27/06/2020       |              |
| B20221      | 19/06/2020      | <20%  | -ve  | 27/06/2020       |              |
| B20222      | 19/06/2020      | <20%  | -ve  | 27/06/2020       |              |
| B20223      | 19/06/2020      | <20%  | -ve  | 27/06/2020       |              |
| B20224      | 19/06/2020      | <20%  | +ve  | 27/06/2020       | Yes          |
| B20225      | 19/06/2020      | <20%  | -ve  | 27/06/2020       |              |
| B20226      | 19/06/2020      | <20%  | -ve  | 27/06/2020       |              |
| B20227      | 19/06/2020      | <20%  | -ve  | 27/06/2020       |              |
| B20228      | 19/06/2020      | <20%  | +ve  | 27/06/2020       |              |
| B20229      | 19/06/2020      | <20%  | -ve  | 27/06/2020       |              |
| B20230      | 19/06/2020      | <20%  | +ve  | 27/06/2020       |              |
| B20231      | 19/06/2020      | <20%  | -ve  | 27/06/2020       |              |
| B20232      | 19/06/2020      | <20%  | -ve  | 27/06/2020       |              |
| B20233      | 19/06/2020      | <20%  | -ve  | 27/06/2020       |              |
| B20234      | 19/06/2020      | <20%  | -ve  | 27/06/2020       |              |
| B20235      | 19/06/2020      | <20%  | -ve  | 27/06/2020       |              |
| B20236      | 19/06/2020      | <20%  | -ve  | 27/06/2020       |              |
| B20237      | 19/06/2020      | <20%  | -ve  | 27/06/2020       |              |
| B20238      | 19/06/2020      | <20%  | -ve  | 27/06/2020       |              |
| B20239      | 19/06/2020      | <20%  | -ve  | 27/06/2020       |              |
| B20240      | 19/06/2020      | <20%  | -ve  | 27/06/2020       |              |
| B20241      | 19/06/2020      | <20%  | -ve  | 27/06/2020       |              |
| B20242      | 19/06/2020      | <20%  | -ve  | 27/06/2020       |              |
| B20243      | 19/06/2020      | <20%  | -ve  | 27/06/2020       |              |
| B20244      | 19/06/2020      | <20%  | -ve  | 27/06/2020       |              |
| B20245      | 19/06/2020      | <20%  | -ve  | 27/06/2020       |              |
| B20246      | 19/06/2020      | <20%  | -ve  | 27/06/2020       |              |
| B20247      | 19/06/2020      | <20%  | -ve  | 27/06/2020       |              |
| B20248      | 19/06/2020      | <20%  | -ve  | 27/06/2020       |              |
| B20249      | 19/06/2020      | <20%  | -ve  | 27/06/2020       |              |

|        |            |       |     |            |     |
|--------|------------|-------|-----|------------|-----|
| B20250 | 19/06/2020 | <20%  | -ve | 27/06/2020 |     |
| B20251 | 19/06/2020 | <20%  | -ve | 27/06/2020 |     |
| B20252 | 19/06/2020 | <20%  | -ve | 27/06/2020 |     |
| B20253 | 19/06/2020 | 36.2% | +ve | 27/06/2020 | Yes |
| B20254 | 19/06/2020 | <20%  | -ve | 27/06/2020 |     |
| B20255 | 19/06/2020 | <20%  | -ve | 27/06/2020 |     |
| B20256 | 19/06/2020 | <20%  | -ve | 27/06/2020 |     |
| B20257 | 19/06/2020 | <20%  | -ve | 27/06/2020 |     |
| B20258 | 19/06/2020 | <20%  | -ve | 27/06/2020 |     |
| B20259 | 19/06/2020 | <20%  | -ve | 27/06/2020 |     |
| B20260 | 19/06/2020 | <20%  | -ve | 27/06/2020 |     |
| B20261 | 19/06/2020 | <20%  | -ve | 27/06/2020 |     |
| B20262 | 20/06/2020 | <20%  | -ve | 27/06/2020 |     |
| B20263 | 20/06/2020 | <20%  | -ve | 27/06/2020 |     |
| B20264 | 20/06/2020 | <20%  | +ve | 27/06/2020 | Yes |
| B20265 | 20/06/2020 | <20%  | -ve | 27/06/2020 |     |
| B20266 | 20/06/2020 | <20%  | -ve | 27/06/2020 |     |
| B20267 | 20/06/2020 | <20%  | +ve | 27/06/2020 |     |
| B20268 | 20/06/2020 | <20%  | -ve | 27/06/2020 |     |
| B20269 | 20/06/2020 | <20%  | -ve | 27/06/2020 |     |
| B20270 | 20/06/2020 | <20%  | -ve | 27/06/2020 |     |
| B20271 | 20/06/2020 | <20%  | +ve | 27/06/2020 | Yes |
| B20272 | 20/06/2020 | 94.7% | +ve | 27/06/2020 |     |
| B20273 | 20/06/2020 | <20%  | -ve | 08/07/2020 |     |
| B20274 | 20/06/2020 | <20%  | -ve | 08/07/2020 |     |
| B20275 | 20/06/2020 | <20%  | -ve | 08/07/2020 |     |
| B20276 | 20/06/2020 | <20%  | -ve | 08/07/2020 |     |
| B20277 | 20/06/2020 | <20%  | -ve | 08/07/2020 |     |
| B20278 | 20/06/2020 | <20%  | +ve | 08/07/2020 |     |
| B20279 | 20/06/2020 | <20%  | -ve | 08/07/2020 |     |
| B20280 | 20/06/2020 | <20%  | -ve | 08/07/2020 |     |
| B20281 | 20/06/2020 | <20%  | -ve | 08/07/2020 |     |
| B20282 | 20/06/2020 | <20%  | -ve | 08/07/2020 |     |
| B20283 | 20/06/2020 | <20%  | -ve | 08/07/2020 |     |
| B20284 | 20/06/2020 | <20%  | -ve | 08/07/2020 |     |
| B20285 | 20/06/2020 | <20%  | -ve | 08/07/2020 |     |
| B20286 | 20/06/2020 | <20%  | -ve | 08/07/2020 |     |
| B20287 | 20/06/2020 | <20%  | -ve | 08/07/2020 |     |
| B20288 | 20/06/2020 | <20%  | -ve | 08/07/2020 |     |
| B20289 | 20/06/2020 | <20%  | -ve | 08/07/2020 |     |
| B20290 | 20/06/2020 | 87.4% | +ve | 08/07/2020 |     |
| B20291 | 20/06/2020 | <20%  | -ve | 08/07/2020 |     |
| B20292 | 20/06/2020 | <20%  | -ve | 08/07/2020 |     |
| B20293 | 20/06/2020 | <20%  | -ve | 08/07/2020 |     |
| B20294 | 20/06/2020 | <20%  | -ve | 08/07/2020 |     |
| B20295 | 20/06/2020 | <20%  | -ve | 08/07/2020 |     |
| B20296 | 20/06/2020 | <20%  | -ve | 08/07/2020 |     |
| B20297 | 20/06/2020 | <20%  | -ve | 08/07/2020 |     |
| B20298 | 20/06/2020 | <20%  | -ve | 08/07/2020 |     |
| B20299 | 20/06/2020 | <20%  | -ve | 08/07/2020 |     |
| B20300 | 20/06/2020 | <20%  | -ve | 08/07/2020 |     |

† NA = sample not available

**Supplementary Table 2. Sequence comparison of ortholog genes and proteins between SARS-CoV-2 and other SARSr-CoVs**

|            | Strain           | Complete genome | Gene region |       |       |       |        |       |        |       |       |       |       |       |
|------------|------------------|-----------------|-------------|-------|-------|-------|--------|-------|--------|-------|-------|-------|-------|-------|
|            |                  |                 | 1ab         | S     | RBD   | 3a    | E      | M     | 6      | 7a    | 7b    | 8     | N     | 10    |
| Nucleotide |                  |                 |             |       |       |       |        |       |        |       |       |       |       |       |
|            | RacCS203         | 91.5%           | 94.3%       | 71.3% | 61.6% | 91.9% | 99.1%  | 94.6% | 96.2%  | 92.4% | 93.9% | 91.6% | 93.2% | 99.2% |
|            | RmYN02           | 93.6%           | 97.1%       | 72.5% | 61.9% | 96.4% | 98.7%  | 94.8% | 96.8%  | 96.2% | 91.0% | 48.7% | 97.3% | 99.2% |
|            | SL-ZC45          | 87.7%           | 89.0%       | 75.5% | 62.5% | 87.8% | 98.7%  | 93.4% | 94.6%  | 88.8% | 94.7% | 88.5% | 91.1% | 99.2% |
|            | SL-ZXC21         | 87.5%           | 88.7%       | 74.9% | 61.6% | 88.9% | 98.7%  | 93.4% | 94.6%  | 89.1% | 95.5% | 88.5% | 91.2% | 99.2% |
|            | Rc- $\alpha$ 319 | 79.2%           | 79.8%       | 72.2% | 70.1% | 83.3% | 97.4%  | 86.6% | 86.6%  | 78.4% | 77.3% | 52.3% | 88.3% | 94.9% |
|            | GD/1/2019        | 90.2%           | 90.2%       | 83.7% | 86.9% | 93.2% | 99.1%  | 93.3% | 95.7%  | 93.4% | 91.7% | 92.1% | 96.2% | 99.2% |
|            | GX-P5L           | 85.2%           | 84.6%       | 83.3% | 79.9% | 87.0% | 97.4%  | 91.3% | 90.9%  | 86.4% | 83.5% | 80.7% | 91.0% | 94.0% |
|            | GX-P4L           | 85.4%           | 84.8%       | 83.6% | 80.0% | 86.8% | 97.4%  | 91.3% | 90.9%  | 86.6% | 83.5% | 81.3% | 91.0% | 88.9% |
|            | RaTG13           | 96.1%           | 96.5%       | 92.3% | 86.3% | 96.3% | 99.6%  | 95.5% | 98.4%  | 95.6% | 99.2% | 97.0% | 96.9% | 99.2% |
| SARS-CoV   | 79.3%            | 79.7%           | 72.3%       | 71.9% | 75.3% | 93.5% | 85.5%  | 75.5% | 82.1%  | 83.8% | 45.8% | 88.2% | 93.2% |       |
| Amino acid |                  |                 | 1ab         | S     | RBD   | 3a    | E      | M     | 6      | 7a    | 7b    | 8     | N     | 10    |
|            | RacCS203         |                 | 97.3%       | 72.3% | 63.7% | 97.5% | 100.0% | 99.1% | 98.4%  | 95.9% | 93.0% | 94.2% | 95.7% | -     |
|            | RmYN02           |                 | 98.8%       | 72.4% | 63.2% | 96.7% | 100.0% | 98.7% | 96.7%  | 95.9% | 83.7% | 28.2% | 98.6% | 97.4% |
|            | SL-ZC45          |                 | 95.6%       | 80.2% | 65.9% | 90.9% | 100.0% | 98.7% | 93.4%  | 87.6% | 93.0% | 94.2% | 94.3% | 97.4% |
|            | SL-ZXC21         |                 | 95.2%       | 79.7% | 65.9% | 92.0% | 100.0% | 98.7% | 93.4%  | 88.4% | 93.0% | 94.2% | 94.3% | -     |
|            | Rc- $\alpha$ 319 |                 | 87.6%       | 76.2% | 73.5% | 87.0% | 98.7%  | 91.0% | 83.6%  | 73.8% | 69.8% | 26.8% | 89.5% | 86.8% |
|            | GD/1/2019        |                 | 96.7%       | 90.0% | 96.9% | 97.1% | 100.0% | 98.7% | 96.7%  | 97.5% | 95.4% | 95.0% | 97.9% | 97.4% |
|            | GX-P5L           |                 | 92.5%       | 92.4% | 86.6% | 89.8% | 100.0% | 98.2% | 95.1%  | 88.4% | 72.1% | 87.6% | 93.8% | 84.2% |
|            | GX-P4L           |                 | 92.5%       | 92.3% | 86.6% | 89.5% | 100.0% | 98.2% | 95.1%  | 88.4% | -     | 87.6% | 93.6% | 73.7% |
|            | RaTG13           |                 | 98.5%       | 97.3% | 90.1% | 97.8% | 100.0% | 99.6% | 100.0% | 97.5% | 97.7% | 95.0% | 99.1% | 97.4% |
| SARS-CoV   |                  | 86.1%           | 75.8%       | 73.1% | 72.4% | 94.7% | 90.5%  | 67.2% | 85.3%  | 81.4% | -     | 90.5% | 81.6% |       |

-indicates ORF with incomplete cds or early termination.



**Supplementary Table 3: Sequence comparison of ortholog genes and proteins between RacCS203 and other SARSr-CoVs**

|            | Strain     | Complete genome | Gene region |       |       |       |       |        |       |       |        |       |       |        |
|------------|------------|-----------------|-------------|-------|-------|-------|-------|--------|-------|-------|--------|-------|-------|--------|
|            |            |                 | 1ab         | S     | RBD   | 3a    | E     | M      | 6     | 7a    | 7b     | 8     | N     | 10     |
| Nucleotide | SARS-CoV-2 | 91.5%           | 94.3%       | 71.3% | 61.6% | 91.9% | 99.1% | 94.3%  | 96.2% | 92.4% | 93.9%  | 91.6% | 93.2% | 99.2%  |
|            | RmYN02     | 93.7%           | 94.3%       | 94.3% | 95.4% | 92.0% | 97.8% | 94.1%  | 95.2% | 91.5% | 87.3%  | 48.2% | 93.7% | 98.3%  |
|            | SL-ZC45    | 86.7%           | 88.0%       | 73.5% | 78.6% | 86.4% | 97.8% | 92.8%  | 92.5% | 88.4% | 93.2%  | 88.0% | 92.5% | 98.3%  |
|            | SL-ZXC21   | 86.6%           | 87.8%       | 73.8% | 79.4% | 87.6% | 97.8% | 92.8%  | 92.5% | 88.8% | 93.9%  | 88.0% | 92.5% | 100.0% |
|            | Rc-o319    | 78.3%           | 79.8%       | 69.8% | 61.8% | 82.5% | 96.5% | 86.9%  | 85.5% | 76.0% | 75.0%  | 52.0% | 86.0% | 94.9%  |
|            | GD/1/2019  | 88.0%           | 90.2%       | 70.6% | 61.0% | 90.9% | 98.3% | 93.4%  | 95.2% | 90.4% | 90.2%  | 91.8% | 93.4% | 99.2%  |
|            | GX-P5L     | 83.1%           | 84.2%       | 70.8% | 64.1% | 87.0% | 96.5% | 92.1%  | 89.3% | 83.1% | 82.7%  | 80.4% | 90.0% | 93.2%  |
|            | GX-P4L     | 83.7%           | 84.4%       | 72.9% | 67.0% | 87.1% | 96.5% | 92.1%  | 89.3% | 83.3% | 83.3%  | 80.3% | 90.0% | 88.0%  |
|            | RaTG13     | 91.4%           | 93.9%       | 71.7% | 62.5% | 92.0% | 98.7% | 94.5%  | 94.6% | 92.9% | 94.7%  | 92.1% | 93.9% | 98.3%  |
|            | SARS-CoV   | 78.4%           | 79.5%       | 69.3% | 64.2% | 75.0% | 93.5% | 85.2%  | 76.3% | 82.1% | 980.2% | 45.5% | 88.6% | 93.2%  |
| Amino acid |            |                 | 1ab         | S     | RBD   | 3a    | E     | M      | 6     | 7a    | 7b     | 8     | N     | 10     |
|            | SARS-CoV-2 |                 | 97.3%       | 72.2% | 63.7% | 97.5% | 100%  | 99.10% | 98.4% | 95.9% | 93.0%  | 94.2% | 95.7% | -      |
|            | RmYN02     |                 | 97.2%       | 98.0% | 99.0% | 96.7% | 100%  | 98.6%  | 98.4% | 95.0% | 81.4%  | 29.8% | 95.7% | -      |
|            | SL-ZC45    |                 | 94.7%       | 76.9% | 90.2% | 91.3% | 100%  | 98.2%  | 95.1% | 87.6% | 95.4%  | 95.0% | 95.7% | -      |
|            | SL-ZXC21   |                 | 94.2%       | 77.1% | 89.8% | 92.4% | 100%  | 98.2%  | 95.1% | 88.4% | 95.4%  | 95.0% | 95.7% | -      |
|            | Rc-o319    |                 | 87.2%       | 75.0% | 64.5% | 86.6% | 98.7% | 90.5%  | 82.0% | 74.6% | 67.4%  | 27.6% | 88.3% | -      |
|            | GD/1/2019  |                 | 96.2%       | 73.1% | 63.7% | 97.5% | 100%  | 98.6%  | 98.4% | 95.0% | 97.7%  | 96.7% | 95.0% | -      |
|            | GX-P5L     |                 | 92.1%       | 73.0% | 64.1% | 90.6% | 100%  | 99.6%  | 96.7% | 86.0% | 72.1%  | 87.6% | 93.6% | -      |
|            | GX-P4L     |                 | 92.1%       | 73.3% | 64.1% | 90.2% | 100%  | 99.6%  | 96.7% | 85.6% | -      | 87.6% | 93.6% | -      |
|            | RaTG13     |                 | 97.1%       | 72.4% | 62.8% | 97.5% | 100%  | 99.6%  | 98.4% | 95.0% | 95.4%  | 95.0% | 95.7% | -      |
| SARS-CoV   |            | 86.1%           | 71.7%       | 64.0% | 72.0% | 94.7% | 91.0% | 68.9%  | 83.6% | 76.7% | -      | 91.5% | -     |        |

-indicates ORF with incomplete cds or early termination.

**Supplementary Table 4. Pan-CoV primers used in this study**

| <b>Primer name</b> | <b>Sequence (5' to 3')</b>        | <b>PCR condition</b>                                                                                                                                         |
|--------------------|-----------------------------------|--------------------------------------------------------------------------------------------------------------------------------------------------------------|
| CoV-FWD1           | CGTTGGIACWAAYBTVCCWYTICARBTRGG    | 95°C for 5 min;<br>15 cycles of 95°C for 30s, 65°C for 30s and 72°C for 45s;<br>35 cycles of 95°C for 30s, 50°C for 30s and 72°C for 45s;<br>72°C for 7 min. |
| CoV-RVS1           | GGTCATKATAGCRTCAVMASWWGCNACNACATG |                                                                                                                                                              |
| CoV-FWD2           | GGCWCCWCCHGGNGARCAATT             | 95°C for 5 min;<br>15 cycles of 95°C for 30s, 65°C for 30s and 72°C for 45s;<br>35 cycles of 95°C for 30s, 50°C for 30s and 72°C for 45s;<br>72°C for 7 min. |
| CoV-RVS2           | GGWAWCCCCAYTGTYGWAYRTC            |                                                                                                                                                              |

**Supplementary Table 5. Accession numbers of the SARSr-CoVs used in this study**

| Accession number | SARSr-CoV                     | Host                                                          |
|------------------|-------------------------------|---------------------------------------------------------------|
| AY278488         | SARS coronavirus BJ01         | <i>Homo sapiens</i>                                           |
| DQ022305         | Bat SC1r-CoV HKU3-1           | <i>Rhinolophus sinicus</i>                                    |
| DQ071615         | Bat SC1r-CoV Rp3              | <i>Rhinolophus sinicus</i> , <i>Rhinolophus ferrumequinum</i> |
| DQ412042         | Bat SC1r-CoV Rf1              | <i>Rhinolophus ferrumequinum</i>                              |
| DQ412043         | Bat SC1r-CoV Rm1              | <i>Rhinolophus macrotis</i>                                   |
| DQ648856         | Bat SC1r-CoV 273/2005         | <i>Rhinolophus ferrumequinum</i>                              |
| DQ648857         | Bat SC1r-CoV 279/2005         | <i>Rhinolophus macrotis</i>                                   |
| FJ588686         | Bat SC1r-CoV Rs672/2006       | <i>Rhinolophus sinicus</i>                                    |
| EPI ISL 410721   | Pangolin SC2r-CoV GD/1/2019   | <i>Manis javanica</i>                                         |
| EPI ISL 412977   | Bat SC2r-CoV RmYN02           | <i>Rhinolophus malayanus</i>                                  |
| JX993987         | Bat SC1r-CoV Rp/Shaanxi2011   | <i>Rhinolophus pusillus</i>                                   |
| JX993988         | Bat SC1r-CoV Cp/Yunnan2011    | <i>Chaerephon plicata</i>                                     |
| KC881005         | Bat SC1r-CoV RsSHC014         | <i>Rhinolophus sinicus</i>                                    |
| KC881006         | Bat SC1r-CoV Rs3367           | <i>Rhinolophus sinicus</i>                                    |
| KF294457         | Bat SC1r-CoV Longquan-140     | <i>Rhinolophus monoceros</i>                                  |
| KF367457         | Bat SC1r-CoV WIV1             | <i>Rhinolophus sinicus</i>                                    |
| KF569996         | Bat SC1r-CoV LYRa11           | <i>Rhinolophus affinis</i>                                    |
| KJ473811         | Bat SC1r-CoV JL201            | <i>Rhinolophus ferrumequinum</i>                              |
| KJ473812         | Bat SC1r-CoV HeB2013          | <i>Rhinolophus ferrumequinum</i>                              |
| KJ473813         | Bat SC1r-CoV SX2013           | <i>Rhinolophus ferrumequinum</i>                              |
| KJ473814         | Bat SC1r-CoV HuB2013          | <i>Rhinolophus sinicus</i>                                    |
| KJ473815         | Bat SC1r-CoV GX2013           | <i>Rhinolophus sinicus</i>                                    |
| KP886808         | Bat SC1r-CoV YNLF 31C         | <i>Rhinolophus ferrumequinum</i>                              |
| KP886809         | Bat SC1r-CoV YNLF 34C         | <i>Rhinolophus ferrumequinum</i>                              |
| KU182964         | Bat SC1r-CoV JTMC15           | <i>Rhinolophus ferrumequinum</i>                              |
| KY352407         | Bat SC1r-CoV BtKY72           | <i>Rhinolophus sp. (bat)</i>                                  |
| KY417142         | Bat SC1r-CoV As6526           | <i>Aselliscus stoliczkanus</i>                                |
| KY417143         | Bat SC1r-CoV Rs4081           | <i>Rhinolophus sinicus</i>                                    |
| KY417144         | Bat SC1r-CoV Rs4084           | <i>Rhinolophus sinicus</i>                                    |
| KY417145         | Bat SC1r-CoV Rf4092           | <i>Rhinolophus ferrumequinum</i>                              |
| KY417146         | Bat SC1r-CoV Rs4231           | <i>Rhinolophus sinicus</i>                                    |
| KY417147         | Bat SC1r-CoV Rs4237           | <i>Rhinolophus sinicus</i>                                    |
| KY417148         | Bat SC1r-CoV Rs4247           | <i>Rhinolophus sinicus</i>                                    |
| KY417149         | Bat SC1r-CoV Rs4255           | <i>Rhinolophus sinicus</i>                                    |
| KY417151         | Bat SC1r-CoV Rs7327           | <i>Rhinolophus sinicus</i>                                    |
| KY417152         | Bat SC1r-CoV Rs9401           | <i>Rhinolophus sinicus</i>                                    |
| KY770858         | Bat SC1r-CoV Anlong-103       | <i>Rhinolophus sinicus</i>                                    |
| KY938558         | Bat SC1r-CoV 16BO133          | <i>Rhinolophus ferrumequinum</i>                              |
| LC556375         | Bat SC2r-CoV Rc-o319          | <i>Rhinolophus cornutus</i>                                   |
| MG772933         | Bat SC2r-CoV ZC45             | <i>Rhinolophus pusillus</i>                                   |
| MG772934         | Bat SC2r-CoV ZXC21            | <i>Rhinolophus pusillus</i>                                   |
| MN996532         | Bat SC2r-CoV RaTG13           | <i>Rhinolophus affinis</i>                                    |
| MT040333         | Pangolin SC2r-CoV GX-P4L      | <i>Manis javanica</i>                                         |
| MT040335         | Pangolin SC2r-CoV GX-P5L      | <i>Manis javanica</i>                                         |
| NC 014470        | Bat SC1r-CoV BM48-31/BGR/2008 | <i>Rhinolophus blasii</i>                                     |
| NC 045512        | SARS-CoV-2 Wuhan-Hu-1         | <i>Homo sapiens</i>                                           |
| MW251308         | Bat SC2r-CoV RacCS203         | <i>Rhinolophus acuminatus</i>                                 |

**Supplementary Table 6. Amino acid sequences of the SARSr-CoV RBD proteins used in this study**

| Protein                  | Amino acid sequence                                                                                                                                                                                                                                                                                                                                 | Source    |
|--------------------------|-----------------------------------------------------------------------------------------------------------------------------------------------------------------------------------------------------------------------------------------------------------------------------------------------------------------------------------------------------|-----------|
| <b>SARS-CoV-2 RBD</b>    | MGWSCILFLVATATGVHSRVQPTESIVRFPNITNLCPFGEVFNATRFASVYAWNRKRIS<br>NCVADYSVLVNSASFSTFKCYGVSPSTKLNLCFTNVDYADSFVIRGDEVRQIAPGQTGKI<br>ADYNYKLPDDFTGCVIAWNSNNLDSKVGGNYNLYRLFRKSNLKPFERDISTEIQAG<br>STPCNGVEGFNCYFPLQSYGFQPTNGVGYQPYRVVLSFELLHAPATVCGPKKSTNLV<br>KNKCVNFNFNGLTGTGVLTESNKKFLPFQFGRDIADTTDAVRDPQTLEILDITPCSHH<br>HHHHHHGGGSGSLNDIFEAQIEWHE     | GenScript |
| <b>SARS-CoV RBD</b>      | MGWSCILFLVATATGVHSNITNLCPFGEVFNATKFPSVYAWERKKISNCVADYSVLYN<br>STFFSTFKCYGVSATKLNLCFSNVYADSFVVKGDDVVRQIAPGQTGVIADYNYKLPDD<br>FMGCVLAWNTRNIDATSTGNVNYKYRYLRHGKLRPFERDISNVPFSPDGKPCPPALN<br>CYWPLNDYGFYTTTGIGYQPYRVVLSFELLNAPATYLEHHHHHHHHGGGSGSLNDIFE<br>AQIEWHE                                                                                      | GenScript |
| <b>SC2r-CoV RaTG13</b>   | MGWSCILFLVATATGVHSRVQPTDSIVRFPNITNLCPFGEVFNATTFASVYAWNRKRIS<br>NCVADYSVLVNSTSFSTFKCYGVSPSTKLNLCFTNVDYADSFVITGDEVRQIAPGQTGKI<br>ADYNYKLPDDFTGCVIAWNSKHIDAKEGGNFNLYRLFRKANLKPFERDISTEIQAG<br>SKPCNGQTLNLCYYPLRYRFGYPTDGVGHQPYRVVLSFELLNAPATVCGPKKSTNL<br>VKNCVNFNFNGLTGTGVLTESNKKFLPFQFGRDIADTTDAVRDPQTLEILDITPCSH<br>HHHHHHHHGGGSGSLNDIFEAQIEWHE     | GenScript |
| <b>SC2r-CoV RmYN02</b>   | MGWSCILFLVATATGVHSRILPSTEVVRFNITNFCPFDKVFNATRFNPNVYAWQRTKIS<br>DCIADYTVLYNSTSFSTFKCYGVSPSKLIDLCTSVYADTFLIRFSEVRQIAPGETGVIAD<br>YNYKLPDDFTGCVLAWNTAQDQIGSYFYRSHRAVKKLPFERDLSSDENGVRTLSTYDF<br>NPNVPLDYQATRVVLSFELLNAPATVCGPKLSTQLVKNRCVNFNFNGLRGTGVLTDSD<br>DKRFQSFQFGRDSADFTDSVRDPQTLQILDISPCSHHHHHHHHHGGGSGSLNDIFEAQI<br>EWHE                      | GenScript |
| <b>SC2r-CoV GX-P5L</b>   | MGWSCILFLVATATGVHSRVQPTISIVRFPNITNLCPFGEVFNASKFASVYAWNRKRIS<br>NCVADYSVLVNSTSFSTFKCYGVSPSTKLNLCFTNVDYADSFVVKGDEVRQIAPGQTGV<br>IADYNYKLPDDFTGCVIAWNSVKQDALTGGNYGYLYRLFRKSKLKPFERDISTEIQAG<br>GSTPCNGQVGLNLCYYPLERYGFHPTTGVNYQPFRVVVLSFELLNGPATVCGPKLSTL<br>VKDKCVNFNFNGLTGTGVLTTSKKQFLPFQFGRDISDTTDAVRDPQTLEILDITPCSH<br>HHHHHHHHGGGSGSLNDIFEAQIEWHE | GenScript |
| <b>SC2r-CoV ZC45</b>     | MGWSCILFLVATATGVHSRVQPTQSVVRFNITNVCPFHKVFNATRFPSVYAWERTKI<br>SDCIADYTVFYNSTSFSTFKCYGVSPSKLIDLCTSVYADTFLIRFSEVRQVAPGQTGVIA<br>DYNYKLPDDFTGCVIAWNTAKQDVGNYFYRSHRSTKLPFERDLSSDENGVRTLSTY<br>DFNPNVPLEYQATRVVLSFELLNAPATVCGPKLSTQLVKNQCVNFNFNGLKGTGVLTD<br>SSKRFQSFQFQGDASDFIDSVRDPQTLEILDITPCSHHHHHHHHHGGGSGSLNDIFEAQK<br>IEWHE                        | GenScript |
| <b>SC2r-CoV RacCS203</b> | MFVFLVLLPLVSSQRVLPSTEVVRFNITNFCPFDKVFNATRFNPNVYAWQRTKISDCIAD<br>YTVLYNSTSFSTFKCYGVSPSKLIDLCTSVYADTFLIRFSEVRQIAPGETGVIADYNYKLP<br>PDDFTGCVLAWNTAKQDQIGSYFYRSHRAVKKLPFERDLSSDENGVRTLSTYDFNPNV<br>LDYQATRVVLSFELLNAPATVCGPKLSTQLVKNRCVNFNFNGLRGTGVLTDSDKRFQ<br>SFQFGRDSADFTDSVRDPQTLQILDISPCSGGGSHHHHHHHHHHH                                           | In-house  |
